# Supplementary material
Source: Springer Nature journal article supplement (https://www.springermedizin.de/resource/supplementary/12916_2005_67_MOESM2_ESM.pdf/9599172)

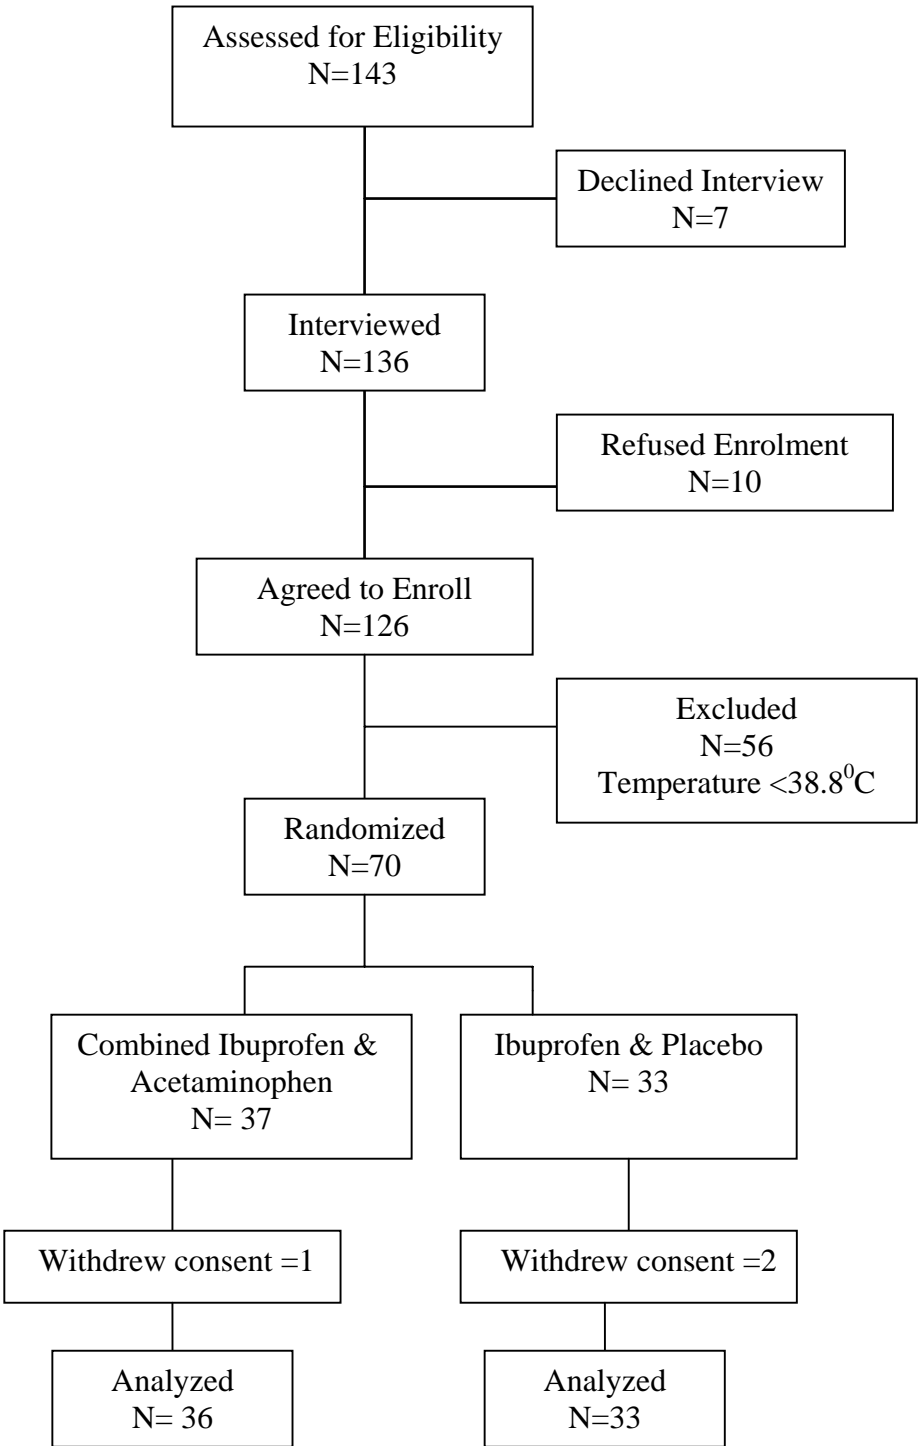

Supplement: MOESM2 [file 9599172]
